# Supplementary material
Source: PubMed Central journal article supplement (PMC6902153)
Supplement: jamaotolaryngolheadnecksurg-146-122-s001.pdf [file jamaotolaryngolheadnecksurg-146-122-s001.pdf]

## Supplementary Online Content

Povolotskiy R, Gupta N, Leverant AB, Kandinov A, Paskhover B. Head and neck injuries associated with cell phone use. *JAMA Otolaryngol Head Neck Surg*. Published online December 5, 2019. doi:10.1001/jamaoto.2019.3678

**eTable 1.** Incidence of Cell Phone Related Injuries per Year

**eTable 2.** Activities During Injury by Age Group

This supplementary material has been provided by the authors to give readers additional information about their work.

**eTable 1.** Incidence of Cell Phone Related Injuries per Year

| Year | Rate<br>(per 1 million person-years) | 95% Confidence<br>Interval |
|------|--------------------------------------|----------------------------|
| 1998 | 1.80                                 | 1.64 - 1.96                |
| 1999 | 2.53                                 | 2.35 - 2.73                |
| 2000 | 2.56                                 | 2.38 - 2.75                |
| 2001 | 3.52                                 | 3.31 - 3.75                |
| 2002 | 5.29                                 | 5.03 - 5.56                |
| 2003 | 3.75                                 | 3.53 - 3.98                |
| 2004 | 5.23                                 | 4.98 - 5.50                |
| 2005 | 5.38                                 | 5.12 - 5.65                |
| 2006 | 4.63                                 | 4.39 - 4.87                |
| 2007 | 8.99                                 | 8.66 - 9.34                |
| 2008 | 6.94                                 | 6.64 - 7.24                |
| 2009 | 7.55                                 | 7.24 - 7.86                |
| 2010 | 13.32                                | 12.91 - 13.73              |
| 2011 | 18.10                                | 17.60 - 18.60              |
| 2012 | 22.50                                | 21.97 - 23.02              |
| 2013 | 22.80                                | 22.20 - 23.40              |
| 2014 | 25.92                                | 25.40 - 26.48              |
| 2015 | 25.29                                | 24.75 - 25.85              |
| 2016 | 29.19                                | 28.61 - 29.79              |
| 2017 | 27.91                                | 27.34 - 28.49              |

**eTable 2.** Activities During Injury by Age Group

| <b>Age Group</b>  | Distracted<br>(n=14,150) | Texting (n=1022) | Walking (n=5080) | Driving (n=7,240) |
|-------------------|--------------------------|------------------|------------------|-------------------|
| Under 13          | 2.10%                    | 2.10%            | 4.00%            | 0.50%             |
| 13-29             | 60.30%                   | 65.30%           | 47.70%           | 66.40%            |
| 30 to 49          | 29.00%                   | 27.40%           | 29.10%           | 23.80%            |
| 50 to 64          | 6.20%                    | 5.20%            | 16.40%           | 8.70%             |
| 65+               | 2.40%                    | 0.00%            | 2.80%            | 0.70%             |
| <b>Cramer's V</b> | 0.289                    | 0.183            | 0.134            | 0.220             |
